# Supplementary material for: Genetic Determinants of Response to Clopidogrel and Cardiovascular Events
Source: Atypon-hosted journal article supplement (doi:10.1056/nejmoa0808227), 2008-12-22
Supplement: nejm_simon_363sa1.pdf [file nejm_simon_363sa1.pdf]

## Supplementary Appendix

This appendix has been provided by the authors to give readers additional information about their work.

Supplement to: Simon T, Verstuyft C, Mary-Krause M, et al. Genetic determinants of response to clopidogrel and cardiovascular events. *N Engl J Med* 2009;360:363-75. DOI: 10.1056/NEJMoa0808227.

# **Genetic determinants of clopidogrel response and cardiovascular events**

Tabassome Simon, M.D., Ph.D., Céline Verstuyft, Pharm. D., Ph.D.,  
Murielle Mary-Krause, Ph.D., Lina Quteineh, M.D., Elodie Drouet, MSc,  
Nicolas Méneveau, M.D., Ph. Gabriel Steg, M.D., Ph.D., Jean Ferrières,  
M.D., Nicolas Danchin, M.D., Ph.D. and Laurent Becquemont, M.D.,  
Ph.D., for the FAST-MI investigators.

## **Supplementary Appendix**

## Methods and reaction conditions used for genotyping

| Allele           | Nucleotide change    | Genotyping method    |
|------------------|----------------------|----------------------|
| <b>P2RY12</b>    |                      |                      |
|                  | (rs16846673)         | SNPlex <sup>£</sup>  |
|                  | (rs6809699)          | SNPlex <sup>£</sup>  |
|                  | (rs6785930)          | SNPlex <sup>£</sup>  |
| <b>ITGB3</b>     | (rs5918)             | Taq man <sup>#</sup> |
| <b>ABCB1</b>     | 3435 C>T (rs1045642) | SNPlex <sup>£</sup>  |
| <b>CYP3A5 *3</b> | 6986 G>A (rs776746)  | SNPlex <sup>£</sup>  |
| <b>CYP2C19</b>   |                      |                      |
| CYP2C19*2        | 681G>A (rs4244285)   | SNPlex <sup>£</sup>  |
| CYP2C19*3        | 636 G>A (rs4986893)  | SNPlex <sup>£</sup>  |
| CYP2C19*4        | 1 A>G (rs28399504)   | Taq man <sup>#</sup> |
| CYP2C19*5        | 1297 C>T (-)         | Taq man <sup>#</sup> |
| CYP2C19*17       | -806C/T (rs12248560) | Taq man <sup>#</sup> |

\* Numbers in parentheses are dbSNP accession numbers.

<sup>£</sup> **Oligo-ligation assay** (SNPlex, Applied Biosystems, Foster City, CA): According to the manufacturer's guidelines, we used two primers, one carrying the SNP-base-specific 3' end and one common primer that starts with the next base 5' to the base-specific primer in the target sequence. The two allele-specific primers carry unique ZIP codes that distinguish each allele. Primers are annealed to the target sequence according to the manufacturer's recommendations. The ligation reaction will join the allele-specific primer with the common primer if the allele-specific 3' base is present. A short fluorescent dye-labelled probe, homologous to the ZIP code sequence, is then hybridized to the immobilized product ([www.appliedbiosystems.com/](http://www.appliedbiosystems.com/)).

<sup>#</sup> **Allelic-discrimination reaction** (TaqMan, Applied Biosystems, Foster City, CA): The PCR amplification protocol for the TaqMan assays included denaturation at 95°C for 10 min, followed by 40 cycles at 92°C for 15 sec, 60°C for 1 min, and 72°C for 45 sec, followed by elongation at 72°C for 5 min. The Taq-Man assays were then read on a 7900HT Fast Real-Time PCR System and alleles were called using SDS software ([www.appliedbiosystems.com/](http://www.appliedbiosystems.com/)).

Table 1: Characteristics of patients in the propensity-matched cohort

|                                                   | Control<br>(n=280) | 2 variant alleles <sup>¶</sup><br>(n = 56) | p    |
|---------------------------------------------------|--------------------|--------------------------------------------|------|
| <b>Demographic and clinical characteristics</b>   |                    |                                            |      |
| Sex Male / Female, No (%)                         | 208 (74%)/72 (26%) | 44 (79%)/12 (21%)                          | 0.61 |
| Age, y *                                          | 64.4 ± 13.5        | 64.9 ± 13.6                                | 0.80 |
| Hypertension, No (%)                              | 145 (52%)          | 29 (52%)                                   | 1.0  |
| Hypercholesterolemia, No (%)                      | 167 (60%)          | 32 (57%)                                   | 0.73 |
| Diabetes mellitus, No (%)                         | 84 (30%)           | 16 (29%)                                   | 0.83 |
| Family history of CAD, No (%)                     | 66 (24%)           | 13 (23%)                                   | 0.95 |
| Current smokers, No (%)                           | 108 (39%)          | 21 (38%)                                   | 0.88 |
| Prior myocardial infarction, No (%)               | 44 (16%)           | 10 (18%)                                   | 0.69 |
| Prior CABG, No (%)                                | 23 (8%)            | 4 (7%)                                     | 1.0  |
| Prior PTCA, No (%)                                | 22 (8%)            | 5 (9%)                                     | 0.79 |
| Prior stroke or transient ischemic attack, No (%) | 6 (2%)             | 1 (2%)                                     | 1.0  |
| Prior Heart Failure, No (%)                       | 12 (4%)            | 4 (7%)                                     | 0.32 |
| Chronic Renal Failure, No (%)                     | 0 (0%)             | 1 (2%)                                     | 0.17 |
| AMI = first Cardiovascular event, No (%)          | 203 (73%)          | 38 (68%)                                   | 0.52 |
| NSTEMI / STEMI, No (%)                            | 136 (47%)/144(53%) | 28 (50%)/28 (50%)                          | 0.94 |
| Body mass index (kg/m <sup>2</sup> ) *            | 26.7 ± 4.6         | 26.9 ± 4.5                                 | 0.79 |
| Systolic blood pressure at admission, *           | 139 ± 28           | 142 ± 31                                   | 0.53 |
| Diastolic blood pressure at admission, *          | 80 ± 18            | 84 ± 19                                    | 0.15 |
| Killip class = 2 or more, No (%)                  | 72 (26%)           | 15 (27%)                                   | 0.87 |
| GRACE Score *                                     | 161.7 ± 38.5       | 162.2 ± 37.1                               | 0.93 |
| Left ventricular ejection fraction (%) *          | 52.3 ± 12.6        | 50.2 ± 16.6                                | 0.46 |
| <b>In-hospital Management</b>                     |                    |                                            |      |
| Angioplasty, No (%)                               | 182 (65%)          | 37 (66%)                                   | 0.88 |
| Thrombolysis, No (%)                              | 39 (14%)           | 8 (14%)                                    | 1.0  |
| Coronary artery bypass surgery, No (%)            | 10 (4%)            | 1 (2%)                                     | 0.70 |
| Statins, No (%)                                   | 257(92%)           | 54 (96%)                                   | 0.40 |
| Beta-blockers, No (%)                             | 243 (87%)          | 47 (84%)                                   | 0.53 |
| Calcium Channel blockers, No (%)                  | 65 (23%)           | 9 (16%)                                    | 0.30 |
| ACEI or ARB, **No (%)                             | 211 (75%)          | 47 (84%)                                   | 0.22 |
| Nitrated Derivatives , No (%)                     | 190 (68%)          | 38 (68%)                                   | 1.0  |
| Aspirin, No (%)                                   | 278 (99%)          | 55 (98%)                                   | 0.42 |
| Heparin, No (%)                                   | 274 (98%)          | 55 (98%)                                   | 0.83 |
| Proton pump inhibitors (PPI), No (%)              | 202 (72%)          | 38 (68%)                                   | 0.52 |
| Omeprazole, No (%)                                | 149 (53%)          | 26 (46%)                                   | 0.38 |
| Diuretics, No (%)                                 | 101 (36%)          | 20 (36%)                                   | 1.0  |
| Aldosterone antagonists, No (%)                   | 25 (9%)            | 9 (16%)                                    | 0.14 |
| Glycoprotein IIb/IIIa inhibitor, No (%)           | 140 (50%)          | 30 (54%)                                   | 0.66 |
| Digitalics glycosides, No (%)                     | 7 (3%)             | 1 (2%)                                     | 1.0  |

\* mean ± sd; \*\* ACEI or ARB: angiotensin-converting enzyme inhibitors or angiotensin receptor blockers; <sup>¶</sup> 2 variant CYP2C19 loss-of-function alleles.
